# Supplementary material for: The Role of the Left Inferior Parietal Cortex in Gilles de la Tourette Syndrome—An rTMS Study
Source: MDPI journal article supplement (doi:10.3390/biomedicines11030980), 2023-03-22
Supplement: s1 [file s1]

## Supplementary Tables

**Supplementary table 1 (S1):** Analysis of the pre- and post-rTMS Rush values in the rTMS and sham stimulation condition in GTS patients

| Rush variable              | Stimulation condition | time | Mean $\pm$ SD <sup>1</sup> | Wilcoxon signed rank-test <sup>2</sup> |         |                                  |
|----------------------------|-----------------------|------|----------------------------|----------------------------------------|---------|----------------------------------|
|                            |                       |      |                            | W-value                                | p-value | Bayes Factor (BF <sub>01</sub> ) |
| Number of body areas       | verum                 | pre  | 3.33 ( $\pm$ 0.84)         | 51.0                                   | 0.719   | 4.07                             |
|                            |                       | post | 3.28 ( $\pm$ 1.05)         |                                        |         |                                  |
|                            | sham                  | pre  | 3.45 ( $\pm$ 0.71)         | 49.0                                   | 0.830   | 4.70                             |
|                            |                       | post | 3.35 ( $\pm$ 0.97)         |                                        |         |                                  |
| Frequency of motor tics    | verum                 | pre  | 2.78 ( $\pm$ 1.01)         | 45.0                                   | 0.653   | 4.47                             |
|                            |                       | post | 2.85 ( $\pm$ 1.10)         |                                        |         |                                  |
|                            | sham                  | pre  | 2.97 ( $\pm$ 1.05)         | 54.5                                   | 0.924   | 4.71                             |
|                            |                       | post | 2.97 ( $\pm$ 1.05)         |                                        |         |                                  |
| Frequency of vocal tics    | verum                 | pre  | 1.41 ( $\pm$ 1.07)         | 83.0                                   | 0.770   | 4.66                             |
|                            |                       | post | 1.38 ( $\pm$ 1.18)         |                                        |         |                                  |
|                            | sham                  | pre  | 1.55 ( $\pm$ 1.28)         | 159.5                                  | 0.280   | 2.80                             |
|                            |                       | post | 1.35 ( $\pm$ 0.97)         |                                        |         |                                  |
| Severity of motor tics     | verum                 | pre  | 3.05 ( $\pm$ 0.70)         | 87.0                                   | 0.964   | 4.62                             |
|                            |                       | post | 2.98 ( $\pm$ 0.88)         |                                        |         |                                  |
|                            | sham                  | pre  | 3.05 ( $\pm$ 0.78)         | 66.0                                   | 0.617   | 4.49                             |
|                            |                       | post | 3.07 ( $\pm$ 0.85)         |                                        |         |                                  |
| Severity of vocal tics     | verum                 | pre  | 1.90 ( $\pm$ 1.19)         | 126.5                                  | 1.000   | 4.87                             |
|                            |                       | post | 1.90 ( $\pm$ 1.45)         |                                        |         |                                  |
|                            | sham                  | pre  | 1.83 ( $\pm$ 1.29)         | 47.5                                   | 0.487   | 3.73                             |
|                            |                       | post | 1.91 ( $\pm$ 1.25)         |                                        |         |                                  |
| Total score                | verum                 | pre  | 12.47 ( $\pm$ 3.57)        | 151.5                                  | 0.692   | 4.51                             |
|                            |                       | post | 12.28 ( $\pm$ 4.11)        |                                        |         |                                  |
|                            | sham                  | pre  | 12.85 ( $\pm$ 3.98)        | 170.5                                  | 0.840   | 4.93                             |
|                            |                       | post | 12.67 ( $\pm$ 3.86)        |                                        |         |                                  |
| Motor tic count per minute | verum                 | pre  | 52.41 ( $\pm$ 30.61)       | 212.0                                  | 0.915   | 5.10                             |
|                            |                       | post | 51.10 ( $\pm$ 28.31)       |                                        |         |                                  |
|                            | sham                  | pre  | 57.26 ( $\pm$ 29.60)       | 237.5                                  | 0.673   | 4.50                             |
|                            |                       | post | 54.70 ( $\pm$ 30.24)       |                                        |         |                                  |

<sup>1</sup> Mean values and standard deviations (SD) of Rush variables, including motor tic count per minute, pre- and post-rTMS in the verum and sham stimulation condition are given.

<sup>2</sup> Results of Wilcoxon signed-rank test (pre- versus post-rTMS Rush value) are given.

**Supplementary table 2 (S2):** Analysis of the difference of pre- and post-rTMS Rush values in the rTMS and sham stimulation condition in GTS patients

| Rush variable              | Stimulation condition | Difference of post- and pre-rTMS Rush score:<br>Mean $\pm$ SD <sup>1</sup> | Wilcoxon signed rank-test <sup>2</sup> |         |                                  |
|----------------------------|-----------------------|----------------------------------------------------------------------------|----------------------------------------|---------|----------------------------------|
|                            |                       |                                                                            | W-value                                | p-value | Bayes Factor (BF <sub>01</sub> ) |
| Number of body areas       | verum                 | -0.05 ( $\pm$ 0.78)                                                        | 83.5                                   | 0.754   | 4.70                             |
|                            | sham                  | -0.10 ( $\pm$ 0.85)                                                        |                                        |         |                                  |
| Frequency of motor tics    | verum                 | 0.07 ( $\pm$ 0.74)                                                         | 85.0                                   | 0.700   | 4.76                             |
|                            | sham                  | 0.00 ( $\pm$ 0.71)                                                         |                                        |         |                                  |
| Frequency of vocal tics    | verum                 | -0.03 ( $\pm$ 0.63)                                                        | 162.5                                  | 0.461   | 3.44                             |
|                            | sham                  | -0.21 ( $\pm$ 0.87)                                                        |                                        |         |                                  |
| Severity of motor tics     | verum                 | -0.07 ( $\pm$ 0.76)                                                        | 81.0                                   | 0.572   | 4.19                             |
|                            | sham                  | 0.01 ( $\pm$ 0.58)                                                         |                                        |         |                                  |
| Severity of vocal tics     | verum                 | 0.00 ( $\pm$ 0.92)                                                         | 116.5                                  | 0.756   | 4.66                             |
|                            | sham                  | 0.09 ( $\pm$ 0.66)                                                         |                                        |         |                                  |
| Total score                | verum                 | -0.19 ( $\pm$ 2.56)                                                        | 173.0                                  | 0.959   | 5.00                             |
|                            | sham                  | -0.17 ( $\pm$ 2.41)                                                        |                                        |         |                                  |
| Motor tic count per minute | verum                 | -1.30 ( $\pm$ 14.35)                                                       | 223.0                                  | 0.915   | 4.80                             |
|                            | sham                  | -2.56 ( $\pm$ 19.15)                                                       |                                        |         |                                  |

<sup>1</sup> Mean values and standard deviations (SD) of the difference between pre- and post-rTMS Rush values (post- minus pre-rTMS Rush value) in the verum and sham stimulation condition are given.

<sup>2</sup> Results of Wilcoxon signed-rank test (verum versus sham stimulation condition) are given.
